# Supplementary material for: Activation of WNT7b autocrine eases metastasis of colorectal cancer via epithelial to mesenchymal transition and predicts poor prognosis
Source: PubMed Central journal article supplement (PMC7893751; doi:10.1186/s12885-021-07898-2), 2021-02-19

# Activation of WNT7b Autocrine Eases Metastasis of Colorectal Cancer via Epithelial to Mesenchymal Transition and Predicts Poor Prognosis

## Additional data

Blot images interpretation

Shuai Jiang; Qiwen Li; Yimin Liu; Huimin Zhang; Qianyu Wang; Yu Chen; Xiaoyang Shi; Jun Li; Hailing Zhang; Yi Zhang; Dongqing Xia; Man Wu; Jiajia Lin; Chenglin Zhang; Suhua Pang; Jiamin Jiang; YAN WEN, M.D.; Peipei Zhang

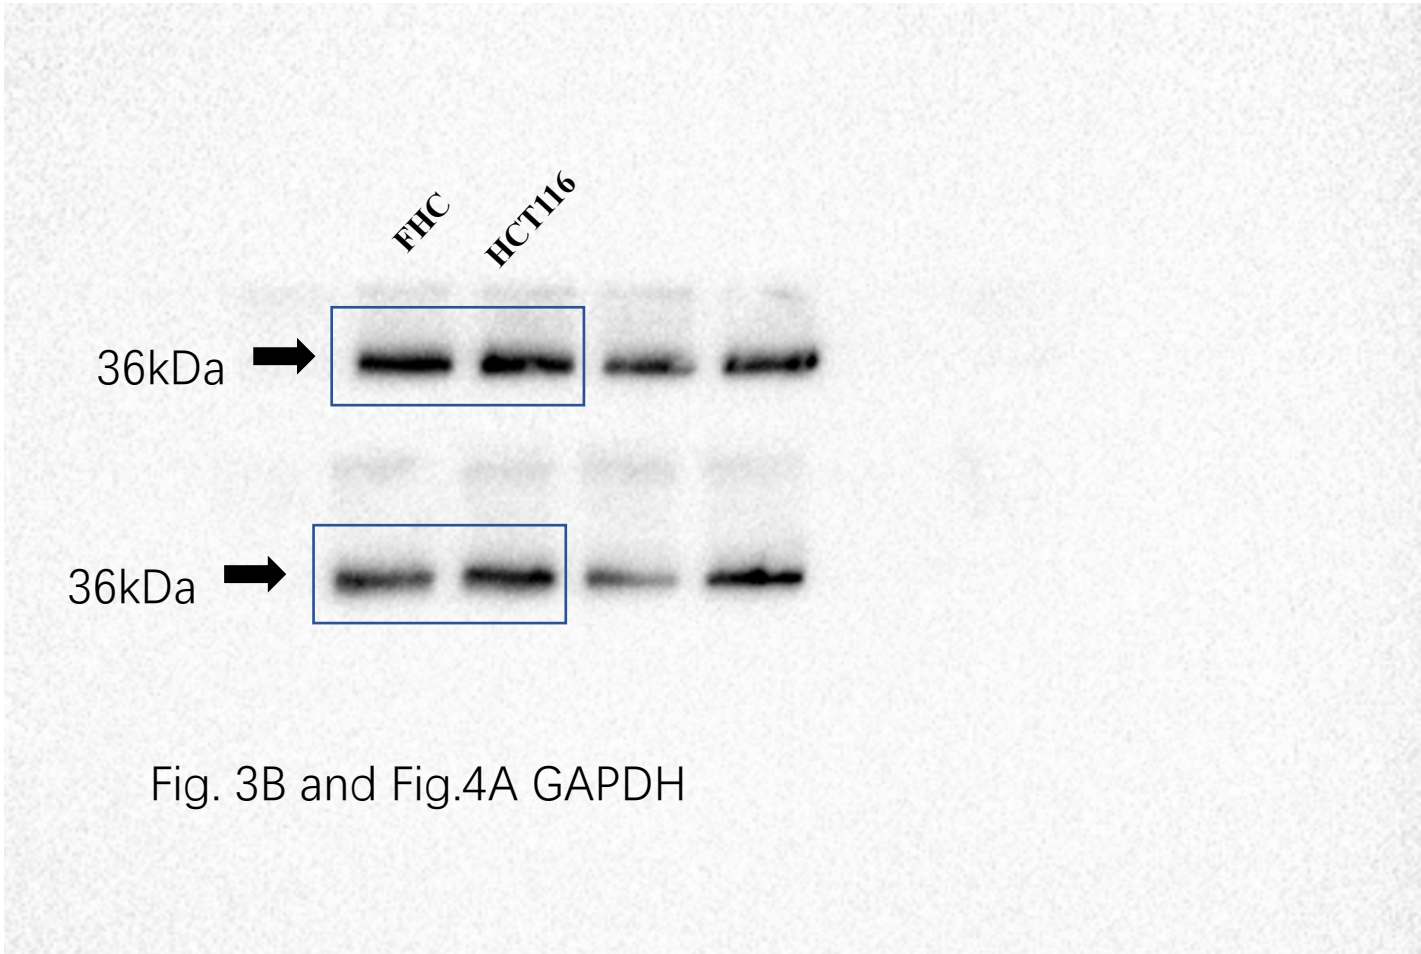

Fig. 3B and Fig.4A GAPDH

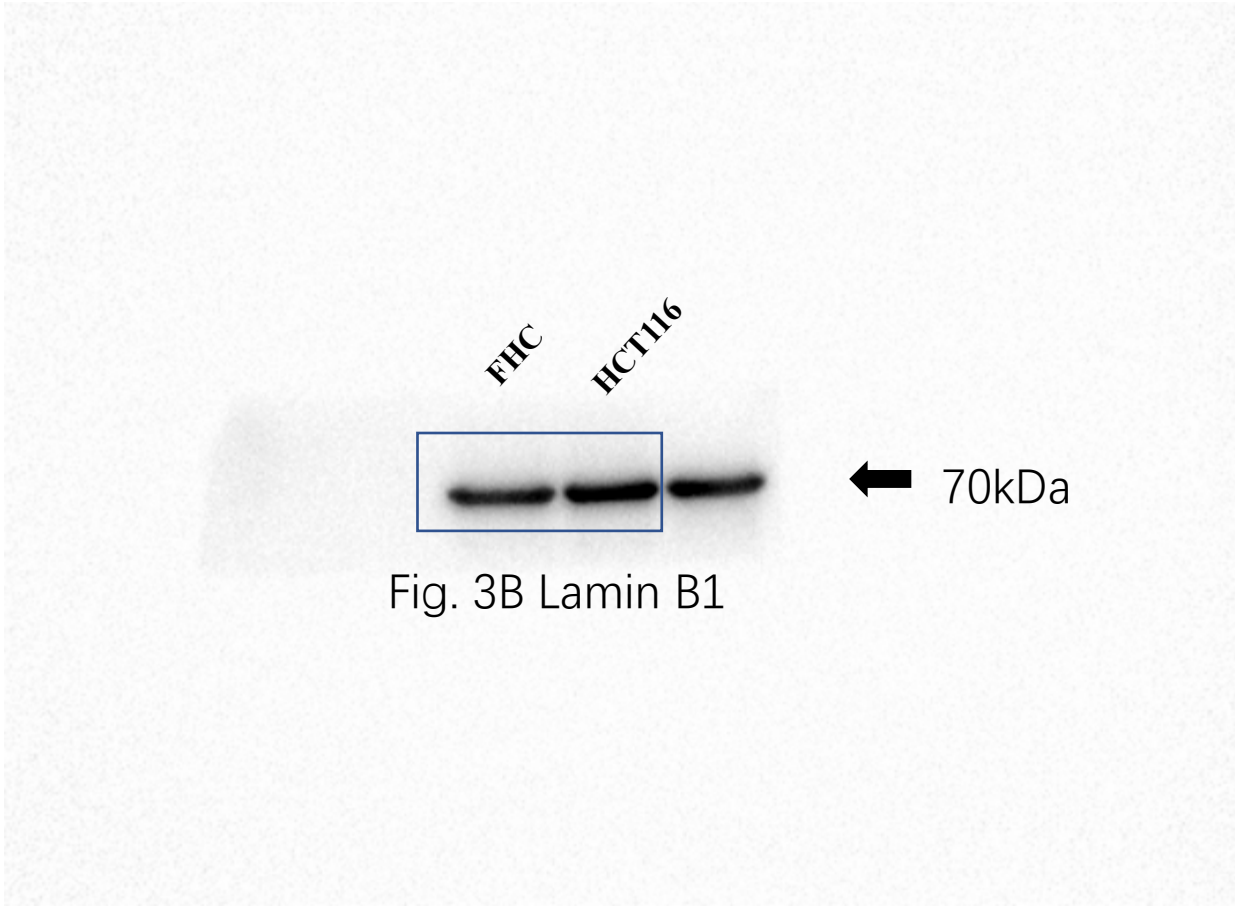

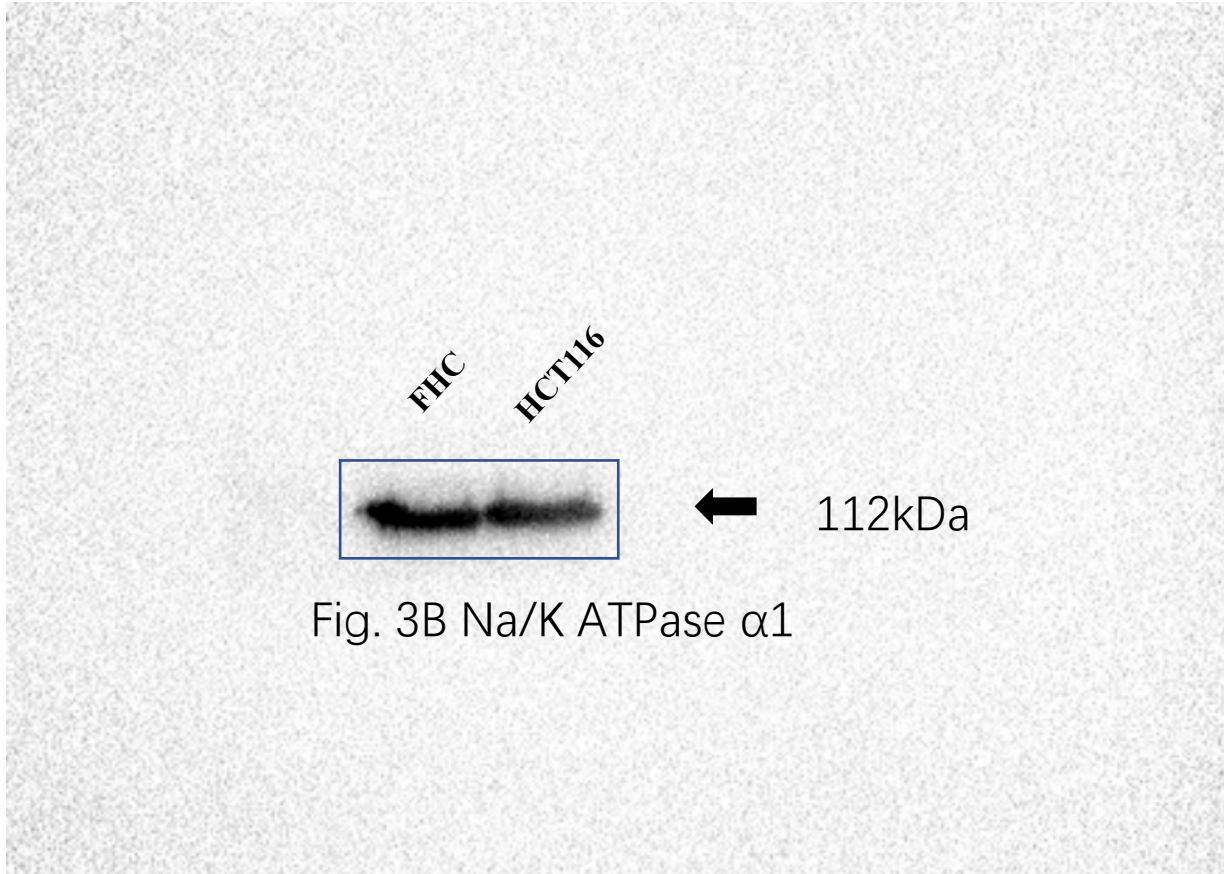

Fig. 3B Na/K ATPase  $\alpha$ 1

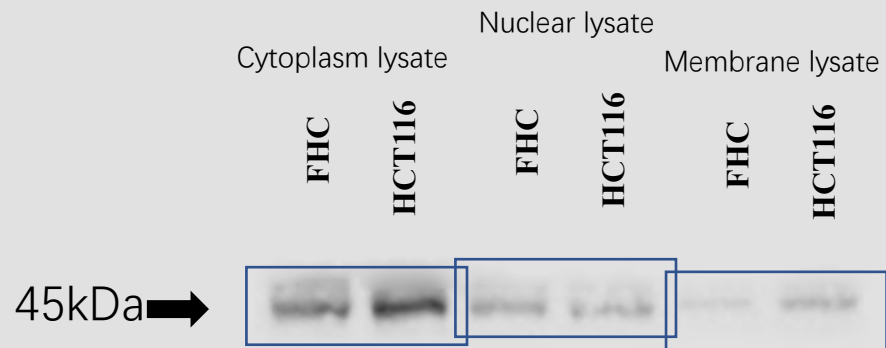

Fig. 3B cytoplasm/nuclear lysate/membrane WNT7b

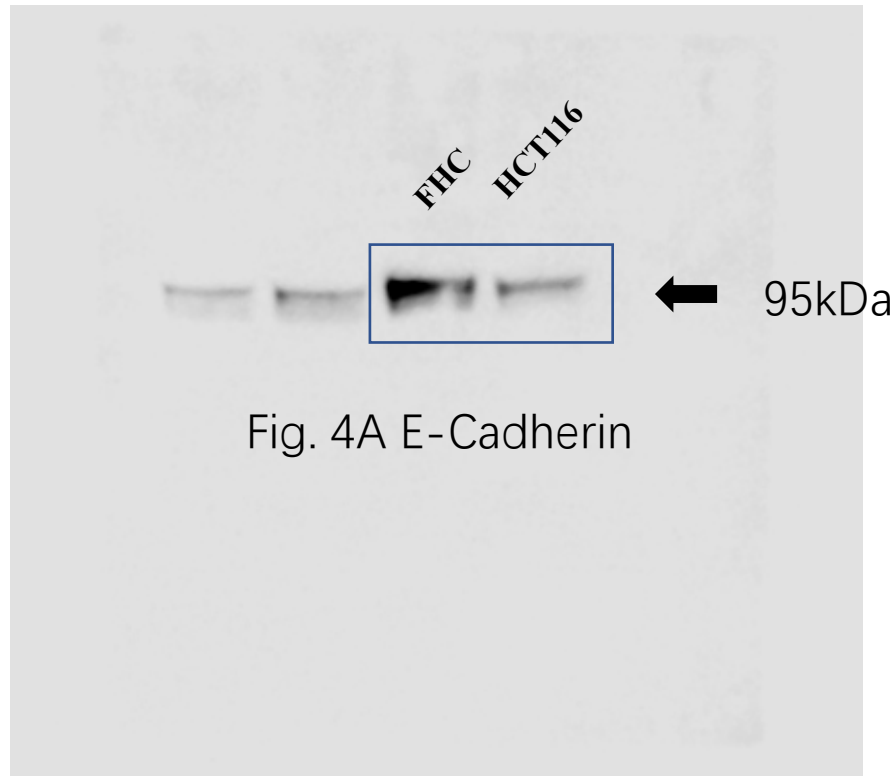

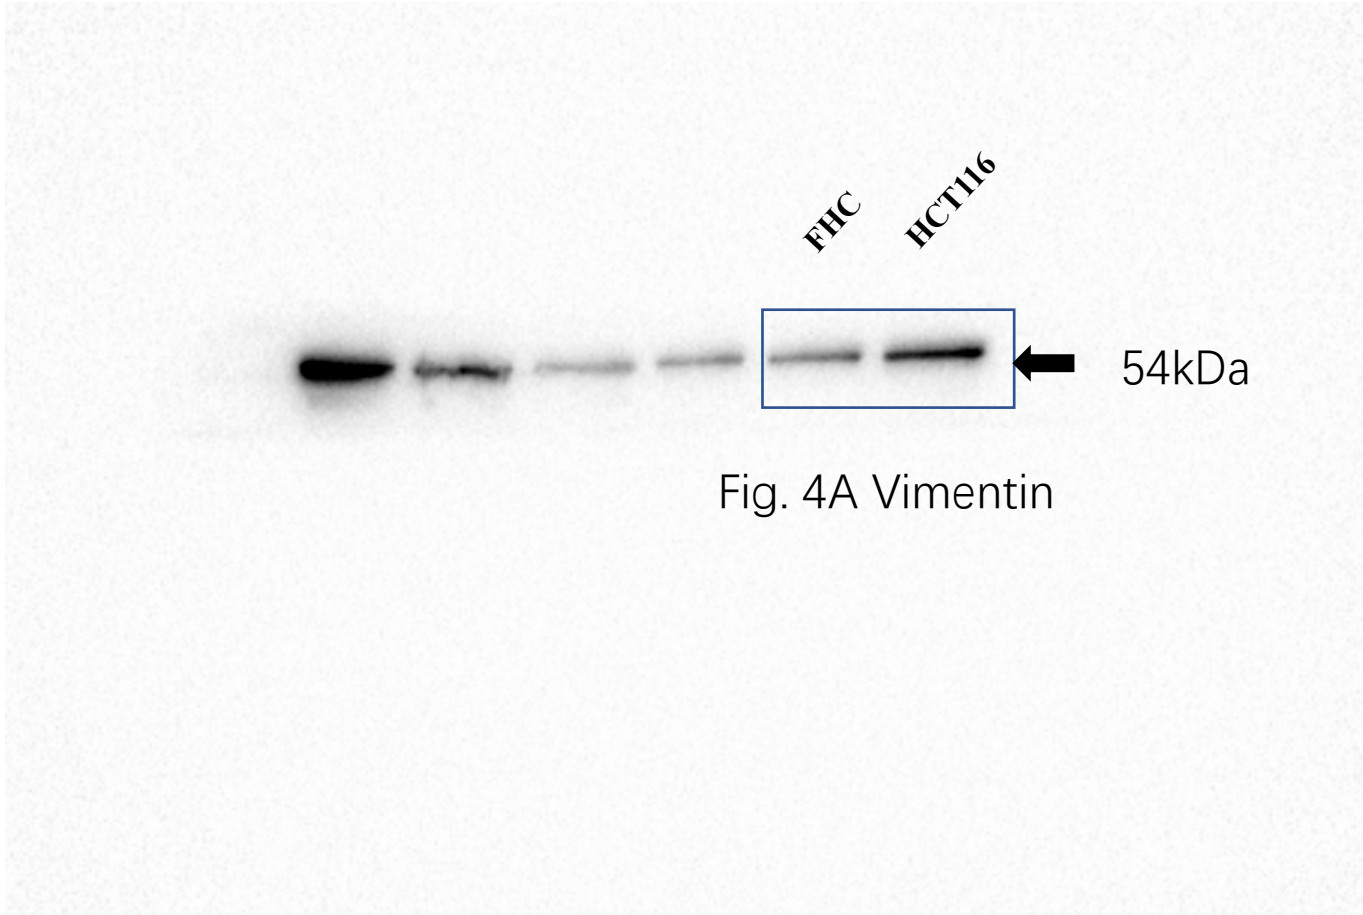

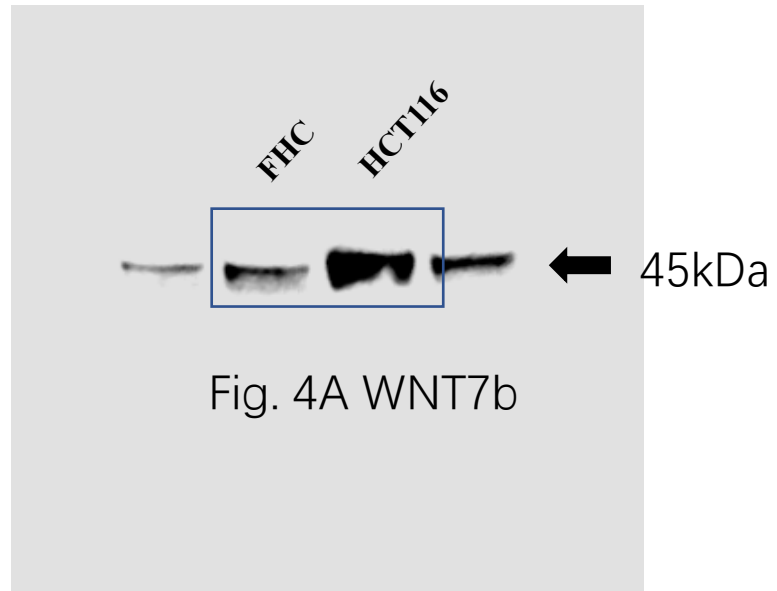



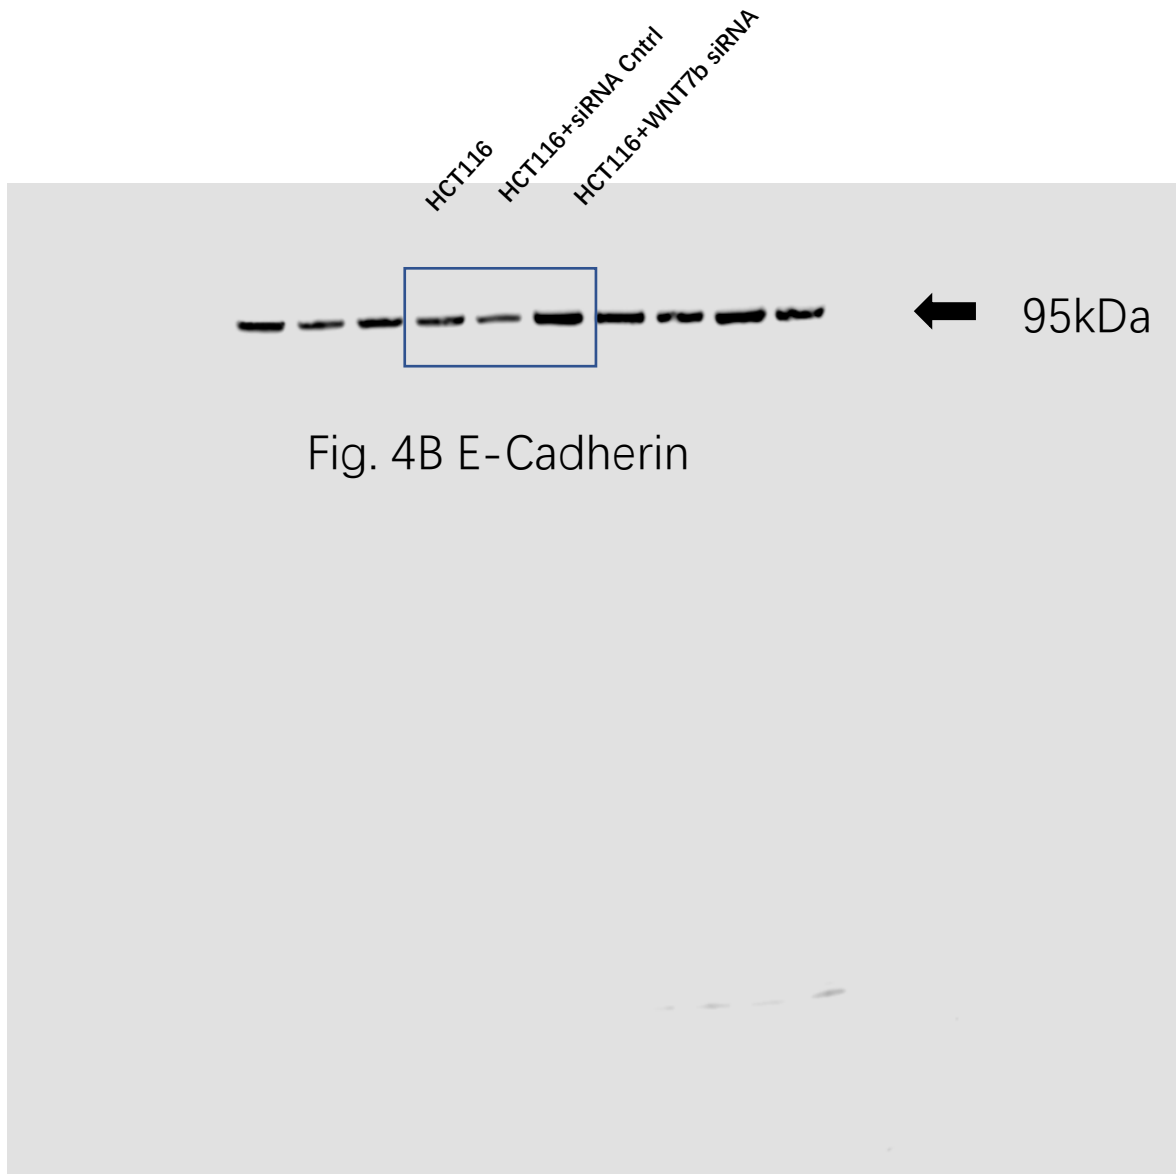

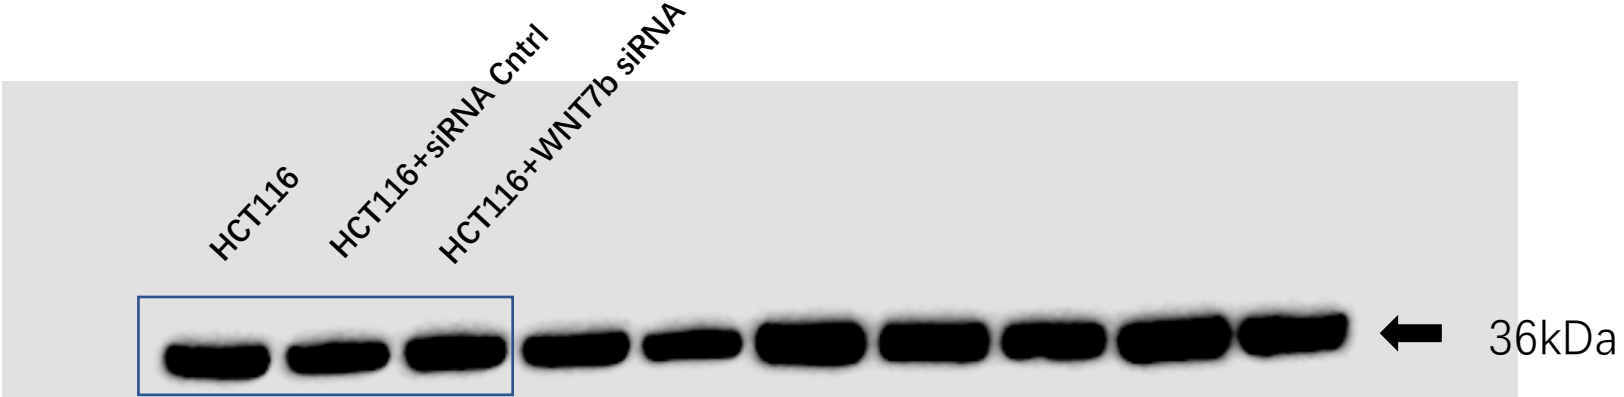

Fig. 4B GAPDH

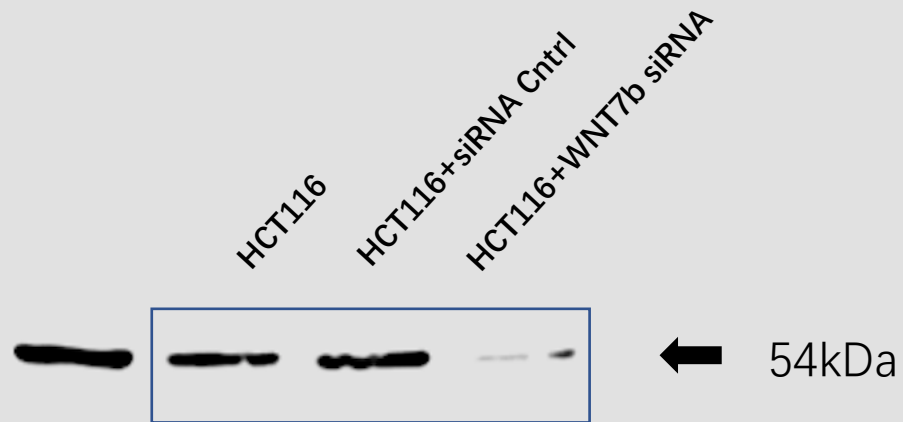

Fig. 4B Vimentin

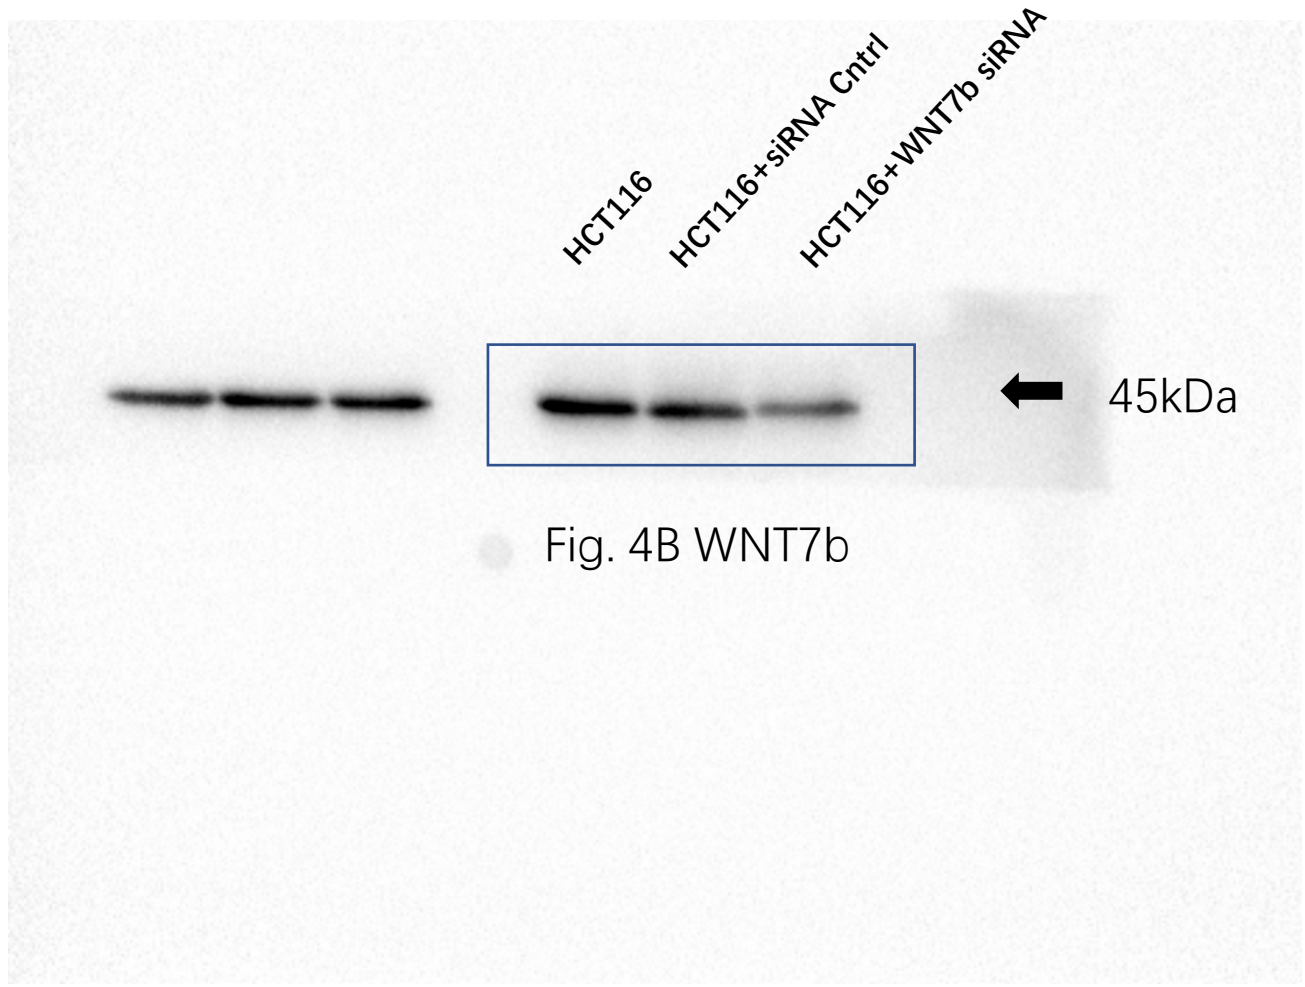

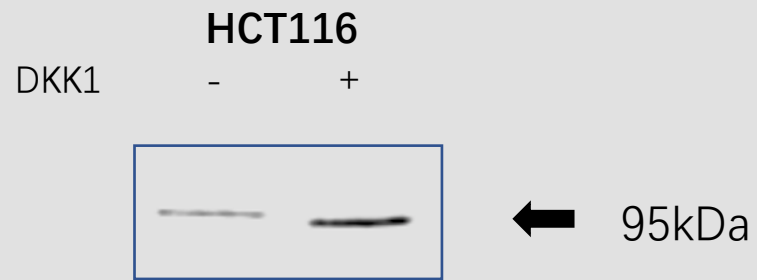

Fig. 4C E-Cadherin

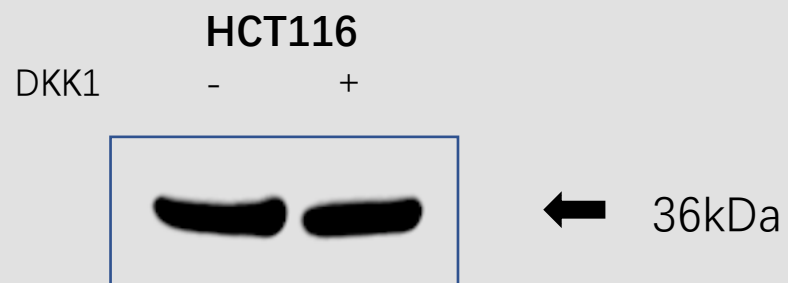

Fig. 4C GAPDH

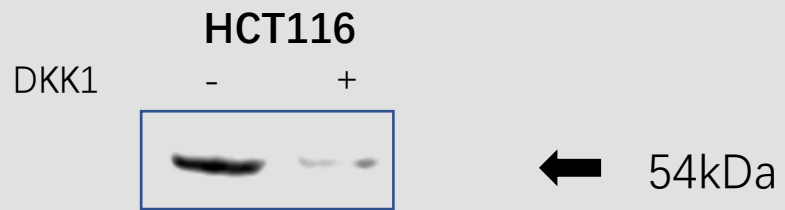

Fig. 4C Vimentin

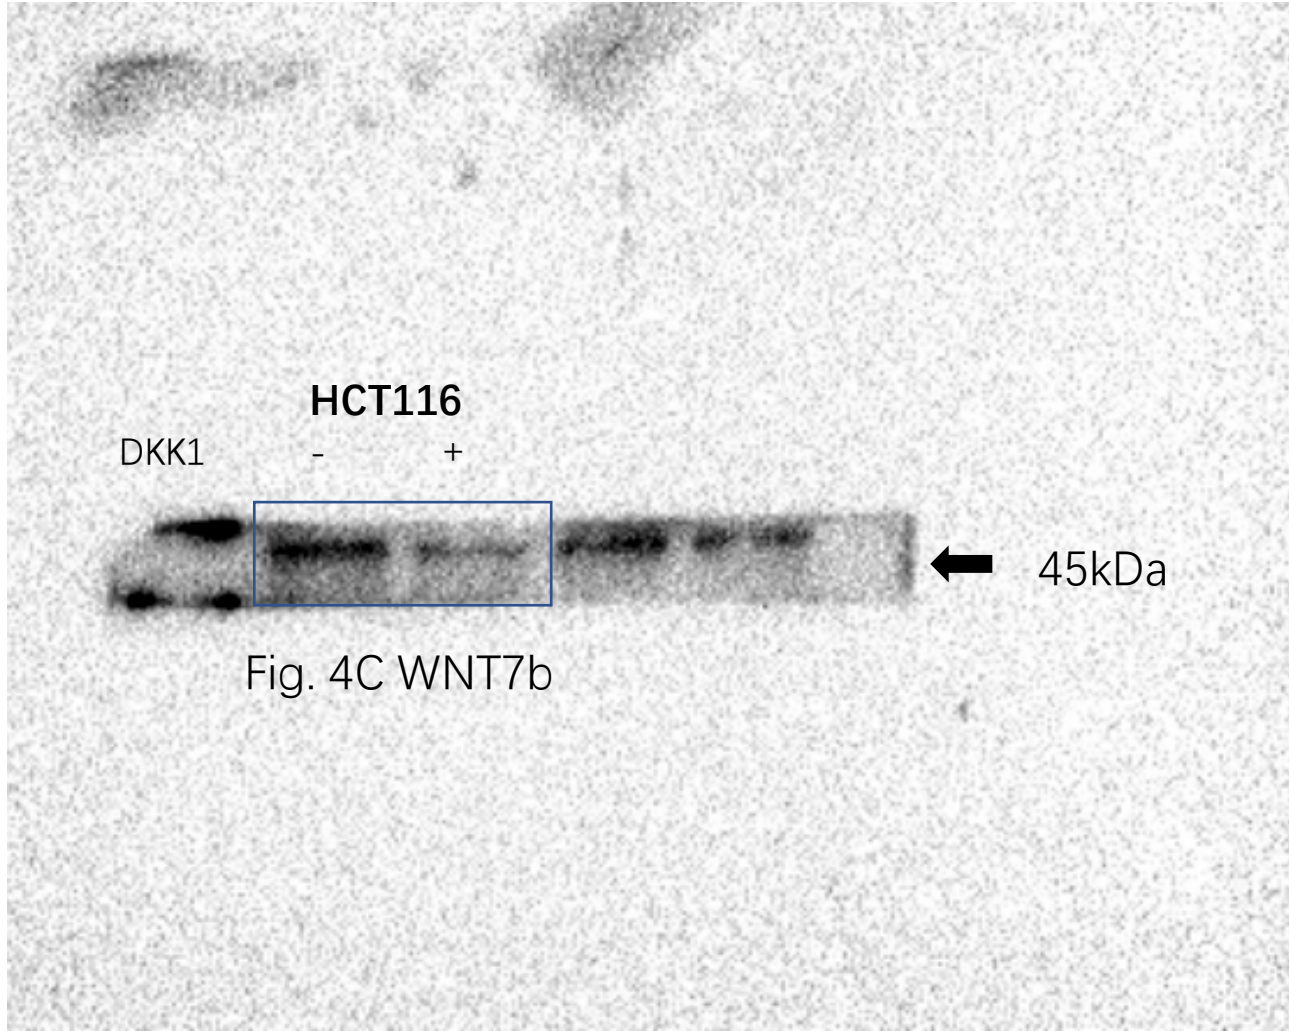

Supplement: 12885_2021_7898_MOESM4_ESM.pdf [file 12885_2021_7898_MOESM4_ESM.pdf]
