# Supplementary material for: Activation of WNT7b autocrine eases metastasis of colorectal cancer via epithelial to mesenchymal transition and predicts poor prognosis
Source: PubMed Central journal article supplement (PMC7893751; doi:10.1186/s12885-021-07898-2), 2021-02-19
Supplement: 12885_2021_7898_MOESM3_ESM.pdf [file 12885_2021_7898_MOESM3_ESM.pdf]

## Supplemental Data 4

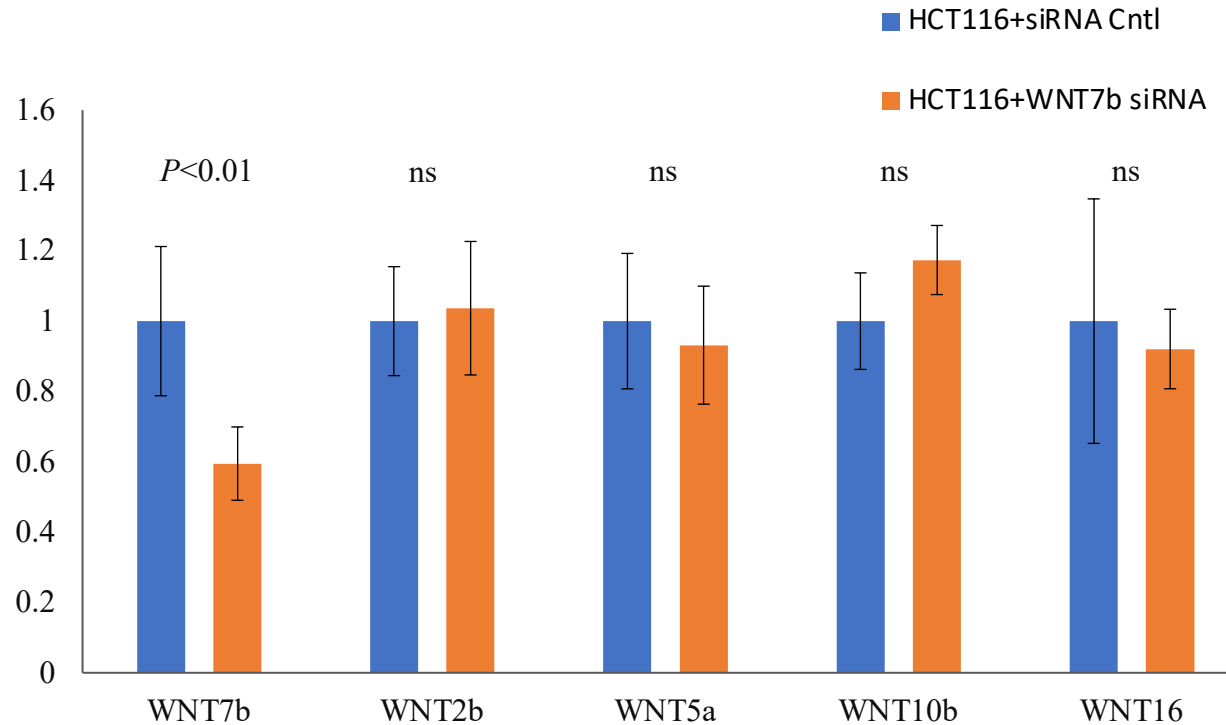

**Supplemental Data 4.** Specificity of WNT7b siRNA was checked by qRT-PCR. WNT7b, WNT2b, WNT5a, WNT10b, and WNT16 transcriptional level in HCT116 NC group and HCT116 WNT7b knock-down group were checked by qRT-PCR analysis. P was calculated by two tails student's t test.
